# Supplementary material for: Molecular self-assembly of a nanorod N-Li4Ti5O12/TiO2/C anode for superior lithium ion storage
Source: Royal Society of Chemistry journal article supplement (doi:10.1039/c8ta05860a), 2018-01-01
Supplement: c8ta05860a1.pdf [file c8ta05860a1.pdf]

## Supplementary Information

### **Molecular self-assembly of a nanorod-like N-Li<sub>4</sub>Ti<sub>5</sub>O<sub>12</sub>/TiO<sub>2</sub>/C anode for superior lithium ion storage**

Sainan Luo<sup>a,1</sup>, Pengcheng Zhang<sup>a,1</sup>, Tao Yuan<sup>a,b,\*</sup>, Jiafeng Ruan<sup>a</sup>, Chengxin Peng<sup>a,b</sup>, Yuepeng Pang<sup>a,b</sup>, Hao Sun<sup>a,b</sup>, Junhe Yang<sup>a,b</sup>, Shiyong Zheng<sup>a,b,\*</sup>

<sup>a</sup> School of Materials Science and Engineering, University of Shanghai for Science and Technology, Shanghai 200093, China

<sup>b</sup> Shanghai Innovation Institute for Materials, Shanghai 200444, China

\* Corresponding author at: School of Materials Science and Engineering, University of Shanghai for Science and Technology, Shanghai 200093, China

E-mail addresses: E-mail: yuantao@usst.edu.cn (T. Yuan), syzheng@usst.edu.cn (S. Zheng).

<sup>1</sup> These authors contributed equally to this work.

## Contents:

**Figure S1.** TGA curve for the NT-LTO/C composite in an air atmosphere with a heating rate of 10 °C min<sup>-1</sup>.

**Figure S2.** TEM photographs of pristine LTO with mechanical mixing of anatase-TiO<sub>2</sub> and LiOH as reactants after calcination at 750 °C for 5 h in a N<sub>2</sub> atmosphere.

**Figure S3.** (a) CV curves from 0.2 to 10 mV s<sup>-1</sup>; (b) analysis of *b*-value for anodic and cathodic peak currents; (c) The plots of  $v^{1/2}$  vs  $i/v^{1/2}$  used for calculating constants  $k_1$  and  $k_2$  at different potentials; (d) capacitive (red) and diffusion currents contributed to charge storage of NT-LTO/C at a scan rate of 1 mV s<sup>-1</sup>.

**Figure S4.** The discharge and charge profiles for the pristine LTO electrode at various rates from 0.5 C to 100 C.

**Figure S5.** The relationship of the voltage vs. *x* in NT-LTO/C and LTO electrodes.

**Figure S6.** Real and imaginary parts of the complex impedance vs.  $\omega^{-1/2}$  for the NT-LTO/C and LTO electrodes.

**Figure S7.** The corresponding cathode and anode curves during the charge/discharge process of LFP||pristine LTO cell.

**Table S1.** Refined structural parameters of Li<sub>4</sub>Ti<sub>5</sub>O<sub>12</sub> obtained from the two phase Rietveld refinement using X-ray powder diffraction data at room temperature. The symbols, *g* and *U*, represent the occupation and isotropic thermal parameters, respectively. The profile factor is *R<sub>p</sub>*, and the weighted profile factor is *R<sub>wp</sub>*.

**Table S2.** Ratio analysis of the peaks in the XPS spectrum of the NT-LTO/C composite

**Table S3.** Ti2p composition from XPS

**Table S4.** N1s composition from XPS

**Table S5.** Values of *A*, *dE/dx* and the diffusion coefficient *D* of NT-LTO/C and LTO electrodes at a discharge voltage of 2.0 V.

**Figure S1**

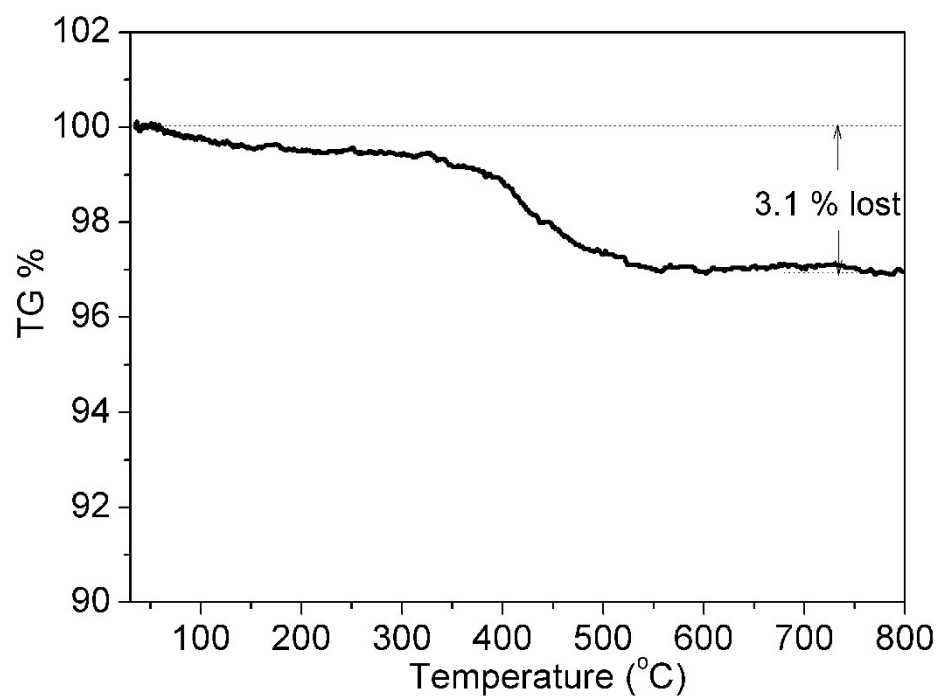

**Figure S1** TGA curve for the NT-LTO/C composite in an air atmosphere with a heating rate of 10 °C min<sup>-1</sup>.

**Figure S2**

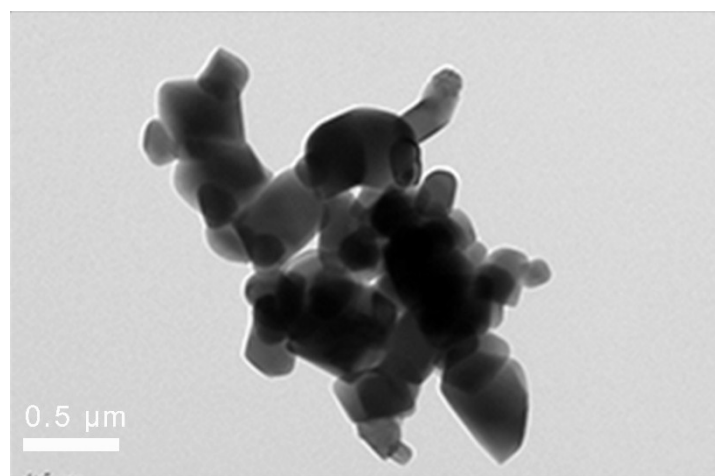

**Figure S2** TEM photographs of pristine LTO with mechanical mixing of anatase-TiO<sub>2</sub> and LiOH as reactants after the calcination at 750 °C for 5 h in a N<sub>2</sub> atmosphere.

**Figure S3**

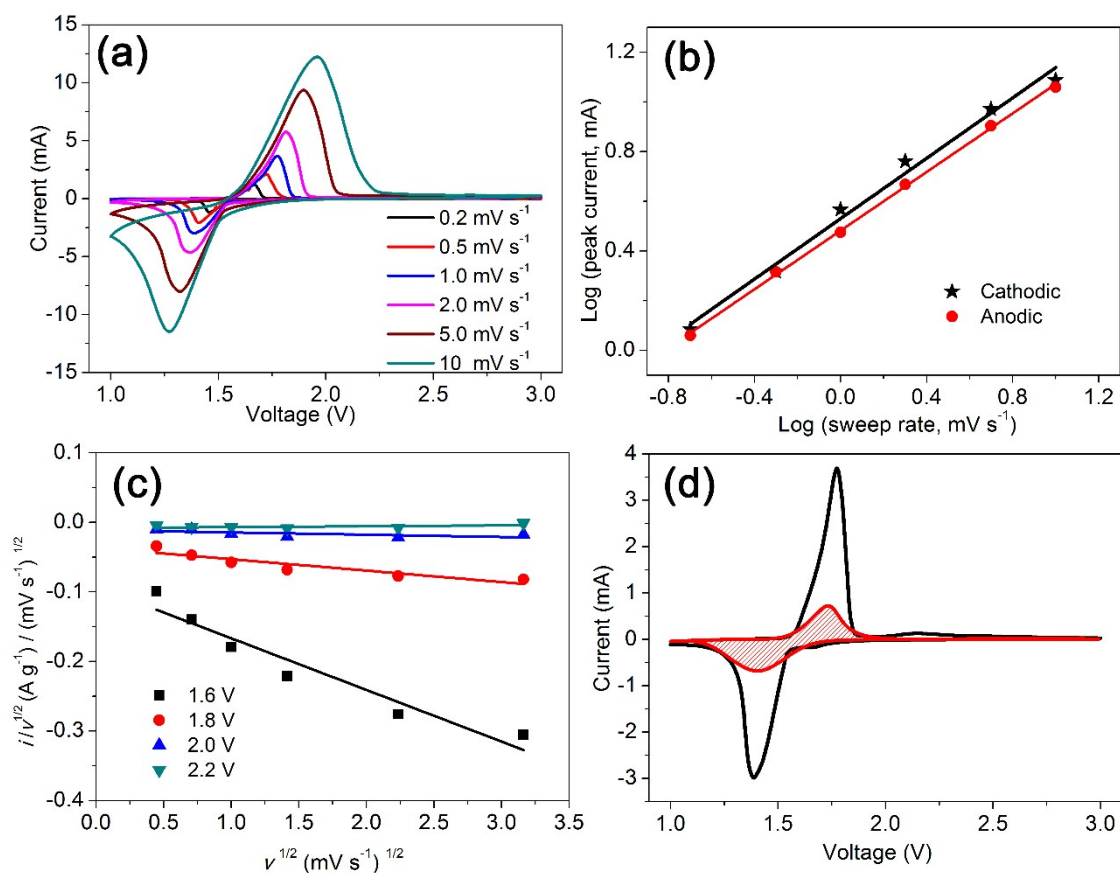

**Figure S3.** (a) CV curves from 0.2 to 10 mV s<sup>-1</sup>; (b) analysis of  $b$ -value for anodic and cathodic peak currents; (c) The plots of  $v^{1/2}$  vs  $i/v^{1/2}$  used for calculating constants  $k_1$  and  $k_2$  at different potentials; (d) capacitive (red) and diffusion currents contributed to charge storage of NT-LTO/C at a scan rate of 1 mV s<sup>-1</sup>.

To investigate the pseudocapacitance performance of the NT-LTO/C electrode, the ion diffusion and charge storage kinetics of NT-LTO/C electrode are investigated by CV at various scan rates from 0.2 to 10 mV s<sup>-1</sup> (**Figure S3a**). **Equation S1** describes the kinetic mechanism by the dependence of the current ( $i$ ) on the scan rate ( $v$ ).<sup>1</sup>

$$i = av^b \quad (\text{Eq. S1})$$

where,  $b$  value is an adjustable parameter, which represents the slope of the  $\log(v)$ – $\log(i)$  plots. Typically, the slope of 0.5 ( $b=0.5$ ) signifies a diffusion-controlled process, and the slope of 1 ( $b=1$ ) suggests a capacitive-controlled behavior (also named surface Faradic redox reaction).<sup>2</sup> As displayed in **Figure S3b**, the cathodic and anodic  $b$  values of NT-LTO/C anode in LIBs are 0.61 and 0.59 respectively, demonstrating that the ion storage mechanism of NT-LTO/C anode tends to both diffusion-controlled and capacitive-controlled processes. Moreover, the contribution ratios of diffusion-controlled processes and capacitive-controlled process are quantitatively separated through the method by Dunn and co-workers:<sup>3</sup>

$$i = k_1v + k_2v^{1/2} \quad (\text{Eq. S2})$$

In **Equation S2**,  $k_1v$  and  $k_2v^{1/2}$  represent the surface capacitive and diffusion-controlled process, respectively.<sup>4,5</sup> The current at a fixed potential ( $i$ ) can be expressed as a combination of  $k_1v$  and  $k_2v^{1/2}$ . By plotting  $i/v^{1/2}$  versus  $v^{1/2}$  (**Figure S3c**), one can determine  $k_1$  and  $k_2$  from the slope and the y-axis intercept point of a straight line, respectively. Comparing the shaded area ( $k_1v$ ) in **Figure S3d**, it can be found that ~30.5 % of the total charge in the NT-LTO/C electrode is surface capacitive (red region) at a scan rate of 1 mV s<sup>-1</sup>. This result suggests that the NT-LTO/C electrode is dominated by pseudocapacitive nature during the charge/discharge process.

**Figure S4**

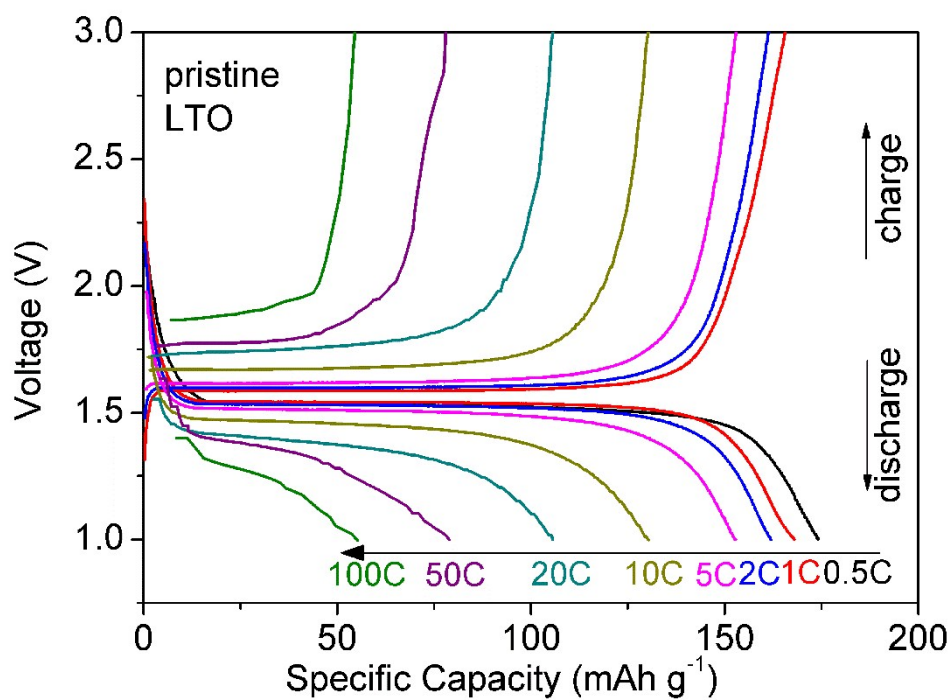

**Figure S4** The discharge and charge profiles for the pristine LTO electrode at various rates from 0.5 C to 100 C.

**Figure S5**

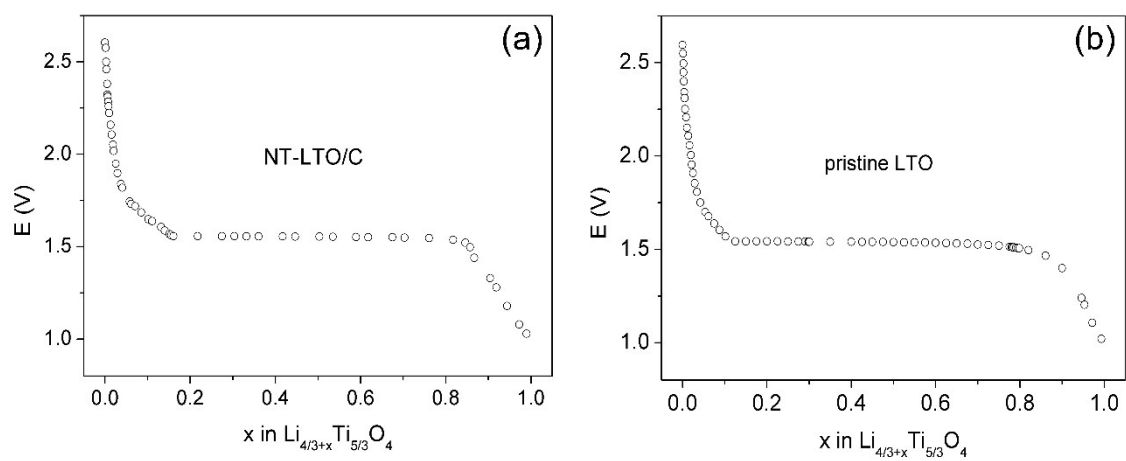

**Figure S5** The relationship of the voltage vs.  $x$  in NT-LTO/C and LTO electrodes.

**Figure S6**

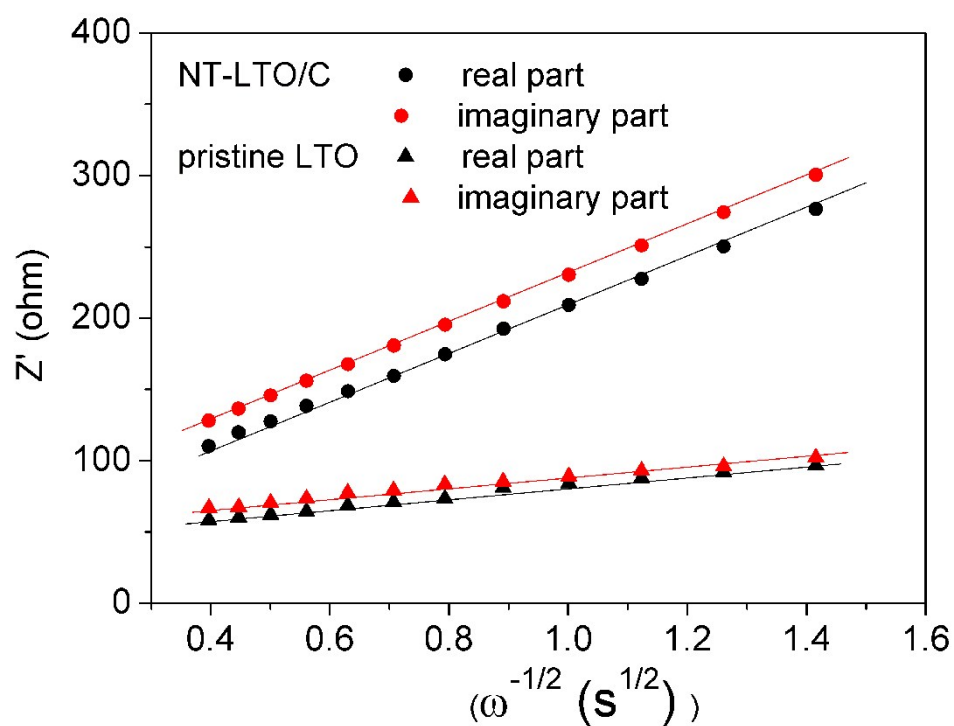

**Figure S6** Real and imaginary parts of the complex impedance vs.  $\omega^{-1/2}$  for the NT-LTO/C and LTO electrodes.

**Figure S7**

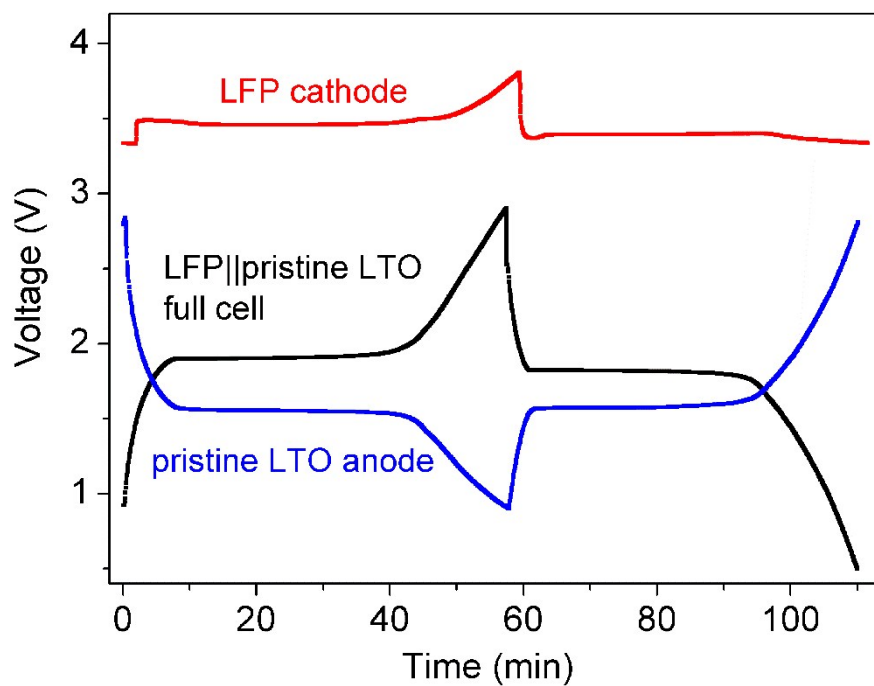

**Figure S7** The corresponding cathode and anode curves during the charge/discharge process of the LFP||pristine LTO cell.

**Table S1** Refined structural parameters of  $\text{Li}_4\text{Ti}_5\text{O}_{12}$  obtained from the two phase Rietveld refinement using X-ray powder diffraction data at room temperature. The symbols, g and U, represent the occupation and isotropic thermal parameters, respectively. The profile factor is

$R_p$ , the weighted profile factor is  $R_{wp}$ .

| $\text{Li}_4\text{Ti}_5\text{O}_{12}$ (phase No. 1)                     |      |        |        |        |        |        |
|-------------------------------------------------------------------------|------|--------|--------|--------|--------|--------|
| Atom                                                                    | site | x      | Y      | z      | g      | U      |
| Li                                                                      | 8a   | 0.0000 | 0.0000 | 0.0000 | 1.000  | 0.0000 |
| Li                                                                      | 16c  | 0.6250 | 0.6250 | 0.6250 | 0.1667 | 0.0000 |
| Ti                                                                      | 16c  | 0.6250 | 0.6250 | 0.6250 | 0.8333 | 0.0000 |
| O                                                                       | 32e  | 0.3890 | 0.3890 | 0.3890 | 1.0000 | 0.0000 |
| a=8.357 Å b=8.357 Å c=8.357 Å $\alpha=\beta=\gamma=90^\circ$            |      |        |        |        |        |        |
| $\text{TiO}_2$ (phase No. 2)                                            |      |        |        |        |        |        |
| Atom                                                                    | site | x      | y      | z      | g      | U      |
| Ti                                                                      | 4a   | 0.0000 | 0.7500 | 0.1250 | 1.0000 | 0.0000 |
| O                                                                       | 8e   | 0.0000 | 0.7500 | 0.3333 | 1.0000 | 0.0000 |
| a=3.785 Å b=3.785 Å c=9.514 Å $\alpha=\beta=\gamma=90^\circ$            |      |        |        |        |        |        |
| R-factors and weight fraction                                           |      |        |        |        |        |        |
| $R_{wp} = 9.77\%$ $R_p = 7.26\%$ $S = 1.5914$                           |      |        |        |        |        |        |
| $\text{Li}_4\text{Ti}_5\text{O}_{12} : 95.48\%$ $\text{TiO}_2 : 4.52\%$ |      |        |        |        |        |        |

**Table S2** Ratio analysis of the peaks in the XPS spectrum of the NT-LTO/C composite

|          | Ratios (% at.) |      |      |      |     |
|----------|----------------|------|------|------|-----|
|          | Li             | Ti   | O    | C    | N   |
| NT-LTO/C | 11.3           | 36.6 | 38.7 | 11.0 | 2.4 |

**Table S3** Ti2p composition from XPS

|                     | Ti <sup>4+</sup> 2p <sub>1/2</sub> | Ti <sup>3+</sup> 2p <sub>1/2</sub> | Ti <sup>4+</sup> 2p <sub>3/2</sub> | Ti <sup>3+</sup> 2p <sub>3/2</sub> |
|---------------------|------------------------------------|------------------------------------|------------------------------------|------------------------------------|
| Binding Energy (eV) | 464.3                              | 463.1                              | 458.4                              | 457.2                              |
| Ratios (% at.)      | 14.41                              | 14.57                              | 47.96                              | 23.06                              |

**Table S4** N1s composition from XPS

| peaks                    | N4                      | N3           | N2         | N1          | TiN   |
|--------------------------|-------------------------|--------------|------------|-------------|-------|
| Nitrogen atom components | High-oxidation states-N | Protonated-N | Pyrrolic-N | Pyridinic-N | TiN   |
| Binding Energy (eV)      | 401.3                   | 400.3        | 399.5      | 398.81      | 397.5 |
| Ratios (atomic %)        | 12.2                    | 33.4         | 12.5       | 5.0         | 36.9  |

**Table S5** Values of  $A$ ,  $dE/dx$  and the diffusion coefficient  $D$  of NT-LTO/C and LTO electrodes at a discharge voltage of 2.0 V.

| Electrodes | $A$    | $dE/dx$ | $D$ (cm <sup>2</sup> s <sup>-1</sup> ) |
|------------|--------|---------|----------------------------------------|
| C-LTO      | 28.22  | 15.957  | $3.01 \times 10^{-12}$                 |
| LTO        | 163.22 | 7.422   | $1.94 \times 10^{-14}$                 |

The chemical diffusion coefficients of Li<sup>+</sup> inside NT-LTO/C and LTO electrodes can be estimated from the impedance results. The following expression for  $Z_w$  was derived by solving Fick's law:<sup>6</sup>

$$Z_w = A\omega^{-1/2} - jA\omega^{-1/2} \quad (\text{Eq. S3})$$

$$A = \frac{V_M(dE/dx)}{\sqrt{2}zFD^{1/2}a} \quad (\text{Eq. S4})$$

where,  $\omega$  is the frequency,  $j = \sqrt{-1}$ , and the pre-exponential factor  $A$  is a constant that contains a concentration independent chemical diffusion coefficient, as shown in **Equation S4**.  $V_M$  is the molar volume of LTO (45.73 cm<sup>3</sup> mol<sup>-1</sup>),  $dE/dx$  values are the slope of the NT-LTO/C and LTO electrode potential curves vs.  $x$  in **Figure S5**,  $z$  is the charge transfer number ( $z=1$  in the lithium intercalation reaction),  $a$  is the electroactive surface area of the electrode, which is

1.13 cm<sup>2</sup> in our testing electrode,  $F$  is the Faraday constant, and  $D$  is the diffusion coefficient. **Figure S6** displays the dependence of the impedances on the frequencies of the NT-LTO/C and LTO electrodes. Both the real and imaginary parts of the impedance were found to be parallel to each other, and proportional to  $\omega^{-1/2}$ . Based on the slope of the plot, the value of  $A$  was obtained. Since  $A$  is inversely proportional to the chemical diffusion coefficient,  $D$ , as demonstrated in **Equation S4**, the larger  $A$ , the slower the diffusion rate of Li<sup>+</sup> in the solid matrix of the electrode should be. **Table S5** lists the values of the  $dE/dx$ ,  $A$  and  $D$  of NT-LTO/C and LTO electrodes. The chemical diffusion coefficients of the NT-LTO/C and LTO electrodes are  $3.01 \times 10^{-12}$  cm<sup>2</sup> s<sup>-1</sup> and  $1.94 \times 10^{-14}$  cm<sup>2</sup> s<sup>-1</sup>, respectively.

## References

1. M. Sathiya, A. S. Prakash, K. Ramesha, J. M. Tarascon, A. K. Shukla, J. Am. Chem. Soc., 2011, 133, 16291-16299.
2. Y. Zhou, X. Rui, W. Sun, Z. Xu, Y. Zhou, W. J. Ng, Q. Yan, E. Fong, ACS Nano, 2015, 9, 4628-4635.
3. J. Wang, J. Polleux, J. Lim, B. Dunn, J. Phys. Chem. C, 2007, 111, 14925-14931.
4. R. Wang, S. Wang, D. Jin, Y. Zhang, Y. Cai, J. Ma, L. Zhang, Energy Storage Materials, 2017, 9, 195-205.
5. H. Wang, Y. Zhang, H. Ang, Y. Zhang, H.T. Tan, Y. Zhang, Y. Guo, J. B. Franklin, X. L. Wu, M. Srinivasan, H. J. Fan, Q. Yan, Adv. Funct. Mater. , 2016, 26, 3082-3093.
6. T. Yuan, X. Yu, R. Cai, Y.K. Zhou, Z.P. Shao, J. Power Sources, 2010, **195**, 4997-5004.
